# Supplementary material for: Personalized anticancer therapy selection using molecular landscape topology and thermodynamics
Source: PubMed Central journal article supplement (PMC5386643; doi:10.18632/oncotarget.12932), 2016-10-26
Supplement: oncotarget-08-18735-s001.pdf [file oncotarget-08-18735-s001.pdf]

## **Personalized anticancer therapy selection using molecular landscape topology and thermodynamics**

### **Supplementary Materials**

**Supplementary Table S1: Complete Summary of the 514 TCGA patients analyzed.**
